# Supplementary material
Source: Springer Nature journal article supplement (https://www.springermedizin.de/resource/supplementary/12933_2013_820_MOESM5_ESM.pdf/9539324)

(a)

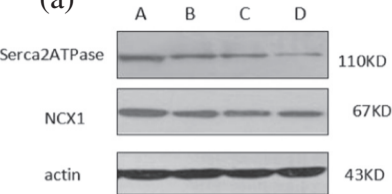

(b)

Serca/ $\beta$  actin protein

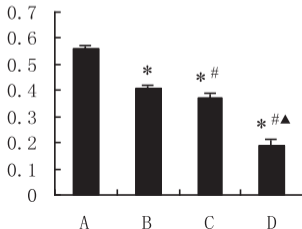

(c)

NCX1/ $\beta$  actin

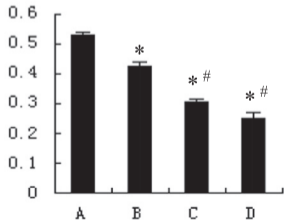

Supplement: MOESM5 [file 9539324]
